1 **Rice paddy *Nitrospirae* encode and express genes related to sulfate respiration:**  
2 **proposal of the new genus *Candidatus SulFOBium***

3 Sarah Zecchin<sup>\*a,b</sup>, Ralf C. Mueller<sup>\*a</sup>, Jana Seifert<sup>c</sup>, Ulrich Stingl<sup>d</sup>, Karthik Anantharaman<sup>e</sup>, Martin  
4 van Bergen<sup>f</sup>, Lucia Cavalca<sup>b</sup>, Michael Pester<sup>#a,g</sup>

5 <sup>\*</sup>contributed equally, <sup>#</sup>corresponding author

6 <sup>a</sup> Department of Biology, University of Konstanz, Konstanz, Germany; <sup>b</sup> Dipartimento di Scienze per  
7 gli Alimenti, la Nutrizione e l'Ambiente (DeFENS), Università degli Studi di Milano, Milano, Italy;  
8 <sup>c</sup> Institute of Animal Science, Hohenheim University, Stuttgart, Germany; <sup>d</sup> University of Florida,  
9 UF/IFAS, Department for Microbiology & Cell Science, Fort Lauderdale Research and Education  
10 Center, Davie, FL, USA; <sup>e</sup> Department of Earth and Planetary Science, University of California,  
11 Berkeley, CA, USA; <sup>f</sup> Helmholtz Centre for Environmental Research—UFZ, Department of  
12 Molecular Systems Biology, Leipzig, Germany; <sup>g</sup> Department Microorganisms, Leibniz Institute  
13 DSMZ – German Collection of Microorganisms and Cell Cultures, Braunschweig, Germany

14 **Short title:** Rice paddy *Nitrospirae* encode sulfate respiration

15 **Keywords:** sulfate-reducing microorganisms, rice paddies, gypsum fertilization, *dsrAB* genes,  
16 *Nitrospirae*

17 Word count abstract: 250 words

18 Word count main text: 4927 words

19

20 <sup>#</sup>Corresponding author: Michael Pester, Department Microorganisms, Leibniz Institute DSMZ –  
21 German Collection of Microorganisms and Cell Cultures, D-38124 Braunschweig, Germany; phone:  
22 +49-531-2616-237; fax: +49-531-2616-418; e-mail: Michael.Pester@dsmz.de

## 23 **Abstract**

24 *Nitrospirae* spp. distantly related to thermophilic, sulfate-reducing *Thermodesulfovibrio* species are  
25 regularly observed in environmental surveys of anoxic marine and freshwater habitats. However, little  
26 is known about their genetic make-up and physiology. Here, we present the draft genome of  
27 *Nitrospirae* bacterium Nbg-4 as a representative of this clade and analyzed its *in situ* protein  
28 expression under sulfate-enriched and sulfate-depleted conditions in rice paddy soil. The genome of  
29 Nbg-4 was assembled from replicated metagenomes of rice paddy soil that was used to grow rice  
30 plants in the presence and absence of gypsum ( $\text{CaSO}_4 \times 2\text{H}_2\text{O}$ ). Nbg-4 encoded the full pathway of  
31 dissimilatory sulfate reduction and showed expression thereof in gypsum-amended anoxic bulk soil  
32 as revealed by parallel metaproteomics. In addition, Nbg-4 encoded the full pathway of dissimilatory  
33 nitrate reduction to ammonia, which was expressed in bulk soil without gypsum amendment. The  
34 relative abundance of Nbg-4-related metagenome reads was similar under both treatments indicating  
35 that it maintained stable populations while shifting its energy metabolism. Further genome  
36 reconstruction revealed the potential to utilize butyrate, formate,  $\text{H}_2$ , or acetate as electron donor, with  
37 the Wood-Ljungdahl pathway being expressed under both conditions. Comparison to publicly  
38 available *Nitrospirae* genome bins confirmed that the pathway for dissimilatory sulfate reduction is  
39 also present in related *Nitrospirae* recovered from groundwater. Subsequent phylogenomics showed  
40 that such microorganisms form a novel genus within the phylum *Nitrospirae*, with Nbg-4 as a  
41 representative species. Based on the widespread occurrence of this novel genus, we propose for Nbg-4  
42 the name *Candidatus SulFOBium mesophilum*, gen. nov., spec. nov.

## 43 **Importance**

44 Rice paddies are indispensable for food supply but are a major source of the greenhouse gas methane.  
45 If not counterbalanced by cryptic sulfur cycling, methane emission from rice paddy fields would be  
46 even higher. However, the microorganisms involved in this sulfur cycling are little understood. By  
47 using an environmental systems biology approach of Italian rice paddy soil, we could retrieve the

48 population genome of a novel member of the phylum *Nitrospirae*. This microorganism encoded the  
49 full pathway of dissimilatory sulfate reduction and expressed it *in situ* under sulfate-enriched and  
50 anoxic conditions. Phylogenomics and comparison to environmental surveys showed that such  
51 microorganisms are actually widespread in freshwater and marine environments. At the same time,  
52 they represent a yet undiscovered genus within the little explored *Nitrospirae*. Our results will be  
53 important to design enrichment strategies and postgenomic studies to fully understand the  
54 contribution of these novel *Nitrospirae* to the global sulfur cycle.

## 55 **Introduction**

56 Sulfate reducing microorganisms (SRM) are regularly observed in rice paddy fields (1-8). Despite  
57 the prevailing low sulfate concentrations in this habitat (lower  $\mu\text{M}$ -range, 9, 10), the rice rhizosphere  
58 and bulk soil are characterized by high sulfate reduction rates, which are comparable to marine surface  
59 sediments (11). This at first sight contradictory observation is explained by a cryptic sulfur cycle.  
60 Here, the small sulfate pool is rapidly reduced to sulfide but the latter also rapidly re-oxidized to  
61 sulfate thus keeping a highly active sulfur cycling running (10-13). This cryptic sulfur cycle can occur  
62 at oxic-anoxic interfaces such as rice roots but apparently runs also in the completely anoxic bulk soil  
63 (10). Under the latter conditions, reduced sulfur species may be re-oxidized with the help of iron  
64 minerals or redox-active parts of humic material such as quinone moieties as shown for other  
65 freshwater habitats (14-16).

66 The ability to perform dissimilatory sulfate reduction is most widespread among members of the  
67 *Deltaproteobacteria* and *Firmicutes* (17). Additional and exclusively thermophilic sulfate reducers  
68 are affiliated to the archaeal phyla *Euryarchaeota* and *Crenarchaeota* and the bacterial phyla  
69 *Thermodesulfobacteria* and *Nitrospirae* (17, 18). The only known SRM in the phylum *Nitrospirae*  
70 are bacteria belonging to the genus *Thermodesulfovibrio* (19-23). All described species of this genus  
71 are thermophilic with their common metabolic properties comprising the reduction of sulfate,  
72 thiosulfate and in some cases sulfite with a limited range of electron donors. These include pyruvate

73 and lactate, which are incompletely oxidized to acetate, or H<sub>2</sub> and formate in a background of acetate  
74 as auxiliary carbon source. Especially the inability for autotrophic growth and the incomplete  
75 oxidation of organic substrates to acetate is a characteristic feature of this genus. Alternative electron  
76 acceptors used by *Thermodesulfovibrio* spp. are Fe(III) and in the case of *Thermodesulfovibrio*  
77 *islandicus* DSM 12570 nitrate (19-23).

78 In addition to the genus *Thermodesulfovibrio*, the phylum *Nitrospirae* currently encompasses the  
79 genera *Nitrospira* and *Leptospirillum*, which comprise species exclusively involved in nitrification  
80 or iron reduction, respectively (24, 25). A group of still uncultured *Nitrospirae*, which form a sister  
81 clade to the genus *Thermodesulfovibrio*, is represented by magnetotactic bacteria belonging to the  
82 putative genera *Candidatus Magnetobacterium* (26-28), *Candidatus Thermomagnetovibrio* (29),  
83 *Candidatus Magnetoovum* (30, 31), and *Candidatus Magnetominusculus* (32). These  
84 microorganisms are typically encountered at the oxic-anoxic interface of sediments but were also  
85 enriched from water of hot springs (33). The observation of sulfur-rich inclusions in the cells of *Ca.*  
86 *Magnetobacterium bavaricum* (27), *Ca. Magnetoovum chiemensis* (31), and *Ca. Magnetoovum*  
87 *mohavensis* (30), the presence of sulfur metabolism genes in the genomes of the former two species  
88 (31), and their predominant occurrence at oxic-anoxic interfaces led to the hypothesis that these  
89 microorganisms could be involved in sulfur oxidation (27, 31, 33).

90 All SRM have the canonical pathway of dissimilatory sulfate reduction in common, which is an  
91 intracellular process that involves an eight-electron reduction of sulfate to sulfide. This pathway  
92 proceeds through the enzymes sulfate adenylyltransferase (Sat), adenylyl posphosulfate reductase  
93 (Apr), dissimilatory sulfite reductase (Dsr), and the sulfide-releasing DsrC (34). In addition, the  
94 complexes QmoAB(C) and DsrMK(JOP) are important in transferring reducing equivalents towards  
95 the pathway of sulfate reduction (35). The only known exception to this rule are ANME-archaea that  
96 anaerobically oxidize methane by a yet unresolved mechanism of sulfate reduction to zero-valent  
97 sulfur (36). The two different subunits of the heterotetrameric dissimilatory sulfite reductase Dsr are

98 encoded by the paralogous genes *dsrA* and *dsrB*, which are frequently used as functional phylogenetic  
99 markers for SRM (37). The phylogeny of reductive bacterial-type DsrAB is subdivided into the  
100 *Deltaproteobacteria*, *Firmicutes*, Environmental, and *Nitrospirae* superclusters (37). DsrAB  
101 sequences affiliated with the *Nitrospirae* supercluster were predominantly found in freshwater and  
102 soil environments and to a smaller extent in marine, industrial, or hot-temperature habitats (37).  
103 Intriguingly, they were also detected before in Italian (10) and Chinese (4, 8) rice paddy soils, but the  
104 detailed phylogenetic affiliation of these *dsrAB*-carrying microorganisms and their possible  
105 involvement in rice paddy sulfur cycling remained unclear.

106 Here, the draft genome of a novel and putatively sulfate reducing species belonging to the phylum  
107 *Nitrospirae* has been obtained from a metagenome survey of rice paddy soil. We present its metabolic  
108 potential and phylogeny as reconstructed from its genome and compare this to *Nitrospirae* genome  
109 bins recently recovered from metagenome studies of groundwater habitats. To support our  
110 conclusions, we present *in situ* protein expression patterns of this novel *Nitrospirae* species as inferred  
111 by a metaproteome analysis of rice paddy soil.

## 112 **Results**

### 113 *A Nitrospirae* genome from rice paddy soil

114 We used a metagenomics approach to identify novel microorganisms involved in rice paddy sulfur  
115 cycling. For this purpose, replicated metagenomes (Table S1) were sequenced from bulk and  
116 rhizosphere soils of rice plants, which were grown either in gypsum-amended ( $\text{CaSO}_4 \times 2\text{H}_2\text{O}$ ) or un-  
117 amended (control) soils. Among the 159 population genome bins that could be retrieved, *Nitrospirae*  
118 genome bin Nbg-4 was outstanding because it encoded *dsrAB*, was of high quality with  $\leq 2\%$  residual  
119 contamination, showed no strain heterogeneity, and had an estimated genome completeness of 75%  
120 (Table 1). The relative abundance of Nbg-4 was highest in the bulk soils averaging 17 RPKM (reads  
121 per kilobase of scaffold per million reads) and roughly three times lower in rhizosphere soils (Figure  
122 1). A two-way analysis of variance (ANOVA) showed that soil compartment had a significant effect

123 on the relative abundance of Nbg-4 ( $F_{2,14}=36.16$ ,  $p<0.001$ ), while gypsum amendment ( $F_{1,14}=0.17$ ,  
124  $p=0.69$ ) and the interaction of soil compartment and gypsum amendment ( $F_{1,12}=0.03$ ,  $p=0.87$ )  
125 remained insignificant. To estimate the index of replication (iRep, 38) of Nbg-4, single reads of  
126 metagenomic replicates were combined per soil habitat to achieve sufficient coverage. This analysis  
127 indicated that roughly three quarters of the population were replicating their genome in freshly  
128 flooded soils, while roughly one third replicated its genome in bulk soils after 58-59 days of  
129 incubation irrespective of gypsum treatment (Table 1). For rhizosphere soils, the coverage was not  
130 sufficient to perform an iRep analysis.

### 131 Reconstruction of a dissimilatory sulfur metabolism

132 The complete pathway for dissimilatory sulfate reduction was recovered in Nbg-4 (Figure 2). Besides  
133 genes encoding Sat and the  $\beta$ -subunit of Apr, which catalyze the activation of sulfate and its  
134 concomitant reduction to sulfite, respectively, also genes for DsrAB and DsrC, which reduce sulfite  
135 further to sulfide could be detected. *aprA* was missing because of an assembly break in the scaffold  
136 after *aprB* (typically *aprA* is downstream of *aprB*). In addition, genes encoding the electron-  
137 transferring QmoABC and DsrMK were detected. *Thermodesulfovibrio* spp. possess in addition to  
138 the module DsrMK also the module DsrJOP, which form together the membrane-bound electron-  
139 transferring complex DsrMKJOP (23, 35). Since *dsrMK* were located at the end of one scaffold in  
140 Nbg-4 and another scaffold started with a long fragment of *dsrP*, it is likely that also Nbg-4 encodes  
141 a complete DsrMKJOP complex. In support of a reductively operating sulfur metabolism, the  
142 presence of *dsrD* directly adjacent to *dsrAB* was detected. DsrD is a small protein of putative  
143 regulatory function present in all sulfate reducers (39) with sporadic encounters in genomes of sulfide  
144 and sulfur-oxidizing bacteria (40). In addition, *dsrN* and *dsrT* as typical genes of the *dsr* operon in  
145 sulfate reducers and sulfur-oxidizing green sulfur bacteria (39, 41) and *hppA*, which codes for a  
146 membrane-bound and proton-translocating pyrophosphatase to pull, e.g., the energy-demanding  
147 reaction of Sat, were detected.

148 All soil samples that were used for metagenome sequencing were also analyzed for their  
149 metaproteome. In bulk soil treated with gypsum, a search against Nbg-4 encoded proteins identified  
150 peptides specific for Sat and DsrA as two essential components of the first and last step of sulfate  
151 reduction, respectively (Figure 2). Peptides specific for DsrA of Nbg-4 were also detected in  
152 rhizosphere soil treated with gypsum. In contrast, no peptides matching Nbg-4 sulfur metabolism  
153 proteins were detected in control treatments without gypsum, neither in the bulk soil nor in the  
154 rhizosphere (Table S2). The fragmented recovery of proteins involved in dissimilatory sulfate  
155 reduction is certainly a result of the low coverage of the proteome of a single microbial population in  
156 the background of the whole soil metaproteome.

157 Based on the recovery of the dissimilatory sulfate reduction pathway in Nbg-4, NCBI's sequence  
158 repositories were searched for additional *dsrAB*-carrying *Nitrospirae* genome bins of high assembly  
159 quality. This analysis identified fourteen additional bins recovered from metagenomes: three from  
160 aquifer sediments (42), nine from aquifer groundwater (42), and two from a deep subsurface water  
161 (43) (Table S3). In-depth analysis of four bins that represent the three additional habitat types revealed  
162 not only the presence of *dsrAB* but also of the complete *dsr* operon including *dsrC*, *dsrD*, *dsrN*, *dsrT*,  
163 and *dsrMKJOP*, which were all in synteny to the respective genes of Nbg-4 (Figure. 3). Only  
164 *Nitrospirae* bacterium CG1-02-44-142 recovered from deep subsurface water had an inversion of  
165 *dsrC*, *dsrT*, and *dsrMKJOP* on its genome. Interestingly, also all other components of the  
166 dissimilatory sulfate reduction pathway including *sat*, *aprBA*, *qmoABC*, and *hppA* were encoded on  
167 these *Nitrospirae* genome bins, either completely or partially depending on the assembly breaks of  
168 the respective scaffolds (Table 2).

#### 169 Nitrate reduction as an alternative respiratory metabolism

170 Nbg-4 also encoded a full set of genes necessary for dissimilatory nitrate reduction to ammonia  
171 (DNRA) (Figure 2). DNRA is employed by members of the genera *Thermodesulfobivrio*,  
172 *Desulfobivrio*, *Desulfobulbus*, *Desulfobacterium*, and *Desulfotomaculum* as alternative respiratory

173 pathway in the absence of sulfate (39). The first step of DNRA is the reduction of nitrate to nitrite.  
174 To perform this step, Nbg-4 contains a periplasmic nitrate reductase NapA that forms a soluble  
175 complex with cytochrome c-containing NapB and couples electron transfer from the quinone pool by  
176 the membrane-associated quinol dehydrogenase module formed by NapGH (Table S2). In Nbg-4, the  
177 nap operon lacks NapC, which is a proposed electron-transferring, membrane-associated protein  
178 typically observed in DNRA-performing SRM. The lack of NapC resembles the situation in *Wolinella*  
179 *succinogenes* that also lacks this protein while being able to perform DNRA (44). The second step of  
180 DNRA employs a six-electron transfer to reduce nitrite to ammonia. In Nbg-4, this step is encoded  
181 by the membrane-bound nitrite reductase complex formed by NrfA, a periplasmic nitrite reductase,  
182 and NrfH, a membrane-associated quinol reductase that delivers electrons to NrfA. Screening of the  
183 obtained metaproteomes for DNRA-related proteins of Nbg-4, identified peptides specific for NapA  
184 and NapG in bulk soils without gypsum treatment. This indicates DNRA-activity of Nbg-4 under  
185 sulfate-depleted conditions. No expression of DNRA-related proteins was detected in bulk soil treated  
186 with gypsum or in the rhizosphere samples, irrespective of gypsum treatment (Table S2).

187 The genetic potential for complete oxidation of organic matter to CO<sub>2</sub>

188 The genome of Nbg-4 encoded the capacity for complete oxidation of acetate to CO<sub>2</sub>. This included  
189 the acetate transporter ActP, activation of acetate to acetyl-CoA by an AMP-forming acetyl-CoA  
190 synthetase (AcsA) and the complete Wood-Ljungdahl pathway (Figure 2, Table S2). Peptides specific  
191 for several of these enzymes could be detected by metaproteomics both in the bulk soil and  
192 rhizosphere irrespective of gypsum treatment (Table S2). The Wood-Ljungdahl pathway included at  
193 the end of its methyl branch a formate dehydrogenase, which provides Nbg-4 with the potential to  
194 utilize also formate as an electron donor. In addition, a periplasm-oriented, membrane-bound  
195 [NiFeSe] hydrogenase (HysLS) was detected, which connects to the quinone pool in the membrane  
196 (Figure 2). However, no peptides related to either one of these two enzyme complexes could be  
197 detected (Table S2). Furthermore, the potential for butyrate degradation via a  $\beta$ -oxidation was



198 encoded. With the exception of the activation step of butyrate to butyryl-CoA, all genes encoding for  
199 the necessary enzymes were recovered (Figure 2). Peptides that match Nbg-4 enzymes involved in  
200 butyrate degradation were detected in rhizosphere but not in bulk soil metaproteomes (Table S2).

201 Coupling of electron transfer to energy conservation could be mediated in Nbg-4 by an electron-  
202 bifurcating Fd:NADP oxidoreductase (NfnAB), a H<sup>+</sup>/Na<sup>+</sup>-pumping Rnf complex (RnfCDGEAB),  
203 and a NADH-quinone oxidoreductase (respiratory complex I, NuoABCDEFGHIJKLMN) (35). In  
204 addition, the full set of genes encoding the ATP synthase was identified (AtpABCDEFHI) (Figure  
205 2). Peptides specific for each of these Nbg-4 enzyme complexes were identified in the various bulk  
206 and rhizosphere soil metaproteomes (Table S2), indicating their active role in electron transfer and  
207 energy conservation.

#### 208 Phylogenetic affiliation of the *Nitrospirae* genome bin Nbg-4

209 A phylogenomic maximum-likelihood tree placed Nbg-4 and eight of the fourteen *dsrAB*-carrying  
210 *Nitrospirae* bacteria recovered in other studies (Table 2) in a stable cluster that branched off between  
211 *Thermodesulfovibrio* spp. and magnetotactic *Nitrospirae*. Two additional *dsrAB*-carrying *Nitrospirae*  
212 bacteria (GWA2-46-11 and GWB2-47-37) formed a sister branch to the Nbg-4 containing cluster and  
213 were more closely related to *Thermodesulfovibrio* species (Figure 4a). The remaining four *dsrAB*-  
214 carrying *Nitrospirae* bacteria branched off more basally within the phylum Nitrospirae forming two  
215 separate lineages with no clear affiliation to previously isolated species (Figure 4a).

216 The same branching pattern was recovered when analyzing deduced DsrAB sequences. Here, the well  
217 separated Nbg-4 containing cluster was most closely related to uncultured *dsrAB* family-level lineage  
218 13 as defined by A. L. Müller et al. (37). Both clusters shared a common origin branching off between  
219 *Thermodesulfovibrio* species and magnetotactic *Nitrospirae* (Figure 4b). As in the phylogenomics  
220 approach, *Nitrospirae* bacteria GWA2-46-11 and GWB2-47-37 formed a stable sister branch that was  
221 more closely related to *Thermodesulfovibrio* species. Interestingly, the *dsrAB* of *Nitrospirae*  
222 bacterium RBG-13-39-12 and CG2-30-41-42, which were the closest relatives to Nbg-4 in the

223 phylogenomics approach, did not fall into the *Nitrospirae* supercluster but were most closely related  
224 to uncultured *dsrAB* family-level lineage 11, which belongs to the Deltaproteobacteria supercluster  
225 (Fig. S1). This indicates lateral gene transfer of *dsrAB* within the phylum *Nitrospirae*, which is further  
226 supported by the DsrAB phylogeny of the basely branching Nitrospirae bacterium RBG-16-64-22.  
227 Here, the respective DsrAB sequences were clearly affiliated to the oxidative bacterial-type DsrAB  
228 having the alphaproteobacterium *Magnetococcus marinus* and *Chlorobi* spp. as closest relatives (Fig.  
229 S1). In contrast, DsrAB of *Nitrospirae* bacteria that formed the second basely branching lineage in  
230 the phylogenomics approach were also clustering basely in the DsrAB *Nitrospirae* supercluster and  
231 clustered within or as closest relatives to uncultured *dsrAB* family-level lineage 10 (Fig. 4B).

232 In a third approach, the phylogenetic position of the partial 23S rRNA gene of Nbg-4 was inferred  
233 when placed into a full-length 23S rRNA gene tree of cultured and uncultured members of the phylum  
234 *Nitrospirae*. Also here, Nbg-4 branched off between stable clusters related to *Thermodesulfovibrio*  
235 species and magnetotactic *Nitrospirae* (Figure 4c), thus corroborating the phylogenetic placement of  
236 the other two approaches.

237 In parallel, a genome-wide average nucleotide identity (gANI) and average amino acid identity  
238 (gAAI) analysis was performed (45-47). The gANI analysis revealed that all *Nitrospirae* genomes  
239 used for the phylogenomic tree reconstruction were less similar than 70% to the genome of Nbg-4  
240 (Table S4). Since this is well below the proposed value of 96.5% to group bacterial strains into the  
241 same species (46), Nbg-4 represents a novel species. The gAAI analysis mainly mirrored the  
242 phylogenomic tree reconstruction. Here, all genomes within the Nbg-4 containing cluster as well as  
243 the sister branch that encompasses *dsrAB*-carrying *Nitrospirae* bacteria GWA2-46-11 and GWB2-  
244 47-37 shared identities between 55 and 100% (Table S5). At the same time, these genomes shared  
245 less than 55% identity to representatives of other genera within the *Nitrospirae*. In addition, the two  
246 basely branching lineages of *dsrAB*-carrying *Nitrospirae* genome bins represented either by  
247 *Nitrospirae* bacterium RBG-16-64-22 or *Nitrospirae* bacteria GWC2-57-13, GWD2-57-8, and

248 GWD2-57-9 shared less than 55% gAAI identity to *Nitrospirae* spp. outside of their respective  
249 lineage. At the same time, the later three *dsrAB*-carrying *Nitrospirae* bacteria shared among  
250 themselves gAAI identities of 62-99% (Table S5). Since 55% gAAI is the lower boundary that is  
251 currently recommended to group bacterial strains into the same genus (45), Nbg-4 and the additional  
252 uncultured *dsrAB*-carrying *Nitrospirae* bacteria listed in Table S3 form three independent genera.

## 253 Discussion

254 Members of the phylum *Nitrospirae*, which form a stable clade between thermophilic  
255 *Thermodesulfovibrio* spp. and magnetotactic *Nitrospirae*, are regularly observed in 16S rRNA gene-  
256 and *dsrAB*-based surveys of anoxic freshwater and marine environments of moderate temperature.  
257 These environments include marine (37) and estuarine (48) sediments, groundwater (42, 49), lake  
258 sediment (50), wetland soil (51), and rice paddy fields (10, 52, 53). Also in rice paddy soil analyzed  
259 in this study, eight species-level operational taxonomic units (OTUs) of such *Nitrospirae* were  
260 observed previously by 16S rRNA gene-based amplicon sequencing (Fig. S2, 7). So far, the genetic  
261 make-up and physiological characteristics of these microorganisms were largely unknown. Here, we  
262 present a detailed genome analysis of *Nitrospirae* bacterium Nbg-4 as a representative of this clade  
263 and analyzed its *in situ* protein expression profile under sulfate-enriched and sulfate-depleted  
264 conditions.

265 Nbg-4 encoded the complete pathway for dissimilatory sulfate reduction (Figure 2). Indeed, there are  
266 several lines of evidence that this newly discovered member of the *Nitrospirae* could represent an  
267 active sulfate reducer in rice paddy soil. From a genomic perspective, Nbg-4 carries not only all genes  
268 necessary for sulfate reduction but also genes of unknown function that are typically found in SRM  
269 such as *dsrD*, *dsrN* and *dsrT* (39). The same *dsr* operon organization (Figure 3) as well as the presence  
270 of all sulfate reduction-related genes (Table 2) were observed in the genomes of the other *dsrAB*-  
271 carrying *Nitrospirae* bacteria that form a stable phylogenetic lineage with Nbg-4 (Figure 4). From a  
272 phylogenetic perspective, *dsrAB* of Nbg-4 and related *Nitrospirae* bacteria were clearly affiliated to

273 the branch of reductively operating DsrAB of bacterial origin, which are phylogenetically separated  
274 from oxidatively operating DsrAB of bacterial origin (37). Most importantly, from an activity  
275 perspective the expression of enzymes involved in sulfate reduction was preferentially detected in  
276 gypsum-treated bulk soil, i.e. under completely anoxic and sulfate-enriched conditions. On the  
277 contrary, under sulfate-depleted conditions in control bulk soil, the expression of DNRA-related  
278 enzymes was detected. From pure culture SRM capable of DNRA, it is known that sulfate is  
279 preferentially respired even in the presence of the thermodynamically more favorable electron  
280 acceptor nitrate and that expression of DNRA-related enzymes is only induced in the absence of  
281 sulfate, which acts as repressor (54).

282 Nevertheless, an involvement of Nbg-4 and related *dsrAB*-carrying *Nitrospirae* in anaerobic sulfur  
283 oxidation cannot be ruled out. For example, dense cell suspensions of the SRMs *Desulfovibrio*  
284 *desulfuricans* and *Desulfobulbus propionicus* are capable of coupling sulfide oxidation to nitrate  
285 reduction (55) and S<sup>0</sup> oxidation to electron transfer to a graphite electrode (56), respectively. In  
286 addition, *Desulfurivibrio alkaliphilus* was recently shown to grow by sulfide oxidation coupled to  
287 DNRA while encoding and transcribing *dsrAB* affiliated to the phylogenetic branch of reductively  
288 operating sulfite reductases (40). *D. alkaliphilus* encoded and expressed also all other genes of the  
289 canonical pathways of sulfate reduction while oxidizing sulfide coupled to DNRA. At the same time,  
290 it lacked all typical sulfur metabolism genes of chemolithotrophic sulfur oxidizers with the exception  
291 of a membrane-bound sulfide-quinone oxidoreductase (Sqr). This led to the proposal that the  
292 canonical pathway of sulfate reduction could act in reverse when coupled to Sqr (40). Interestingly,  
293 Nbg-4 encoded Sqr as well, which showed a moderate similarity (54% amino acid identity) to Sqr of  
294 *D. alkaliphilus*. However, Sqr of Nbg-4 could not be identified to be expressed in the analyzed rice  
295 paddy metaproteomes (Table S2). The overall picture is further complicated by the phylogenetic  
296 placement of Nbg-4 and related *dsrAB*-carrying *Nitrospirae* between the genus *Thermodesulfovibrio*,  
297 which contains exclusively sulfate-reducing species, and magnetotactic *dsrAB*-carrying *Nitrospirae*,  
298 which are proposed to be capable of sulfur oxidation. Since genes encoding the biosynthesis of

299 magnetosomes were not detected in the largely recovered genome of Nbg-4 and it was significantly  
300 more abundant in the completely anoxic bulk soil (Figure 1), a lifestyle comparable to magnetotactic  
301 *Nitrospirae* can be most likely excluded.

302 In a preceding study, exclusively members of the Deltaproteobacteria (*Syntrophobacter*,  
303 *Desulfovibrio*, unclassified Desulfobulbaceae, and unclassified Desulfobacteraceae species) were  
304 identified to respond by population increase towards higher sulfate availability in rice paddy soil (7).  
305 The current study utilized soil from exactly the same experiment and identified Nbg-4 as an additional  
306 potential SRM. Nbg-4 did clearly not respond by changes in population size towards sulfate  
307 availability (Figure 1) but most likely by a switch in energy metabolism, i.e., from nitrate reduction  
308 under sulfate-depleted conditions to sulfate reduction under sulfate-enriched conditions (see above).  
309 This interpretation is supported by porewater sulfate concentrations reported in the previous study  
310 (7), where sulfate concentrations steadily declined from 2.6 to 0.5 mM throughout the incubation  
311 period in gypsum-amended bulk soil but were below the detection limit in unamended bulk soil.  
312 Together, both studies reveal that rice paddy SRM may follow different ecological strategies, either  
313 by activity response coupled to growth (Deltaproteobacteria) or by switching the energy metabolism  
314 to maintain a stable population (Nbg-4). Interestingly, species-level OTUs obtained in the previous  
315 study and which fall into a phylogenetic lineage resembling the Nbg-4 cluster (Fig. S2), constituted  
316 relative population sizes of up to 0.2% of the overall bacterial community in bulk soil irrespective of  
317 gypsum treatment (re-analyzed from 7). As such, these novel *Nitrospirae* constitute moderately  
318 abundant members of the bacterial bulk soil community. This is in accordance to a study of three  
319 different Chinese rice paddy soils, where comparable population sizes were recorded (52).

320 Nbg-4 and related *dsrAB*-carrying *Nitrospirae*, which were all recovered from groundwater systems,  
321 clearly formed a separate lineage within the *Nitrospirae*. This was supported by three independent  
322 phylogeny inference approaches as based on highly conserved marker genes, the *dsrAB* genes, and  
323 the 23S rRNA gene (Figure 4). Further indirect evidence was provided by the same branching pattern

324 of 16S rRNA genes affiliated to the phylum *Nitrospirae* and recovered from the same microcosms  
325 (Fig. S2). In accordance with the performed gAAI analysis, Nbg-4 and related *dsrAB*-carrying  
326 *Nitrospirae* that form this separate lineage, constitute a newly discovered genus (Table S5). In  
327 addition, Nbg-4 represents a clearly distinct species in comparison to all members within this novel  
328 genus as based on the performed gANI analysis (Table S4). Based on its distinct potential physiology,  
329 separation into an own phylogenetic lineage, and predominant occurrence in habitats of moderate  
330 temperature, the following name is proposed for Nbg-4: *Candidatus* *Sulfobium* *mesophilum*  
331 [etymology: *Sulfobium* gen. nov. (Sul.fo'bi.um. L. n. *sulfur* sulfur; Gr. n. *bios* life; N.L. neut. n.  
332 *Sulfobium* a living entity metabolizing sulfur compounds), *S. mesophilum* sp. nov. (me.so'phi.lum.  
333 Gr. adj. *mesos* middle; Gr. adj. *philos* friend, loving; N.L. neut. n. *mesophilum*, loving medium  
334 temperatures)].

## 335 **Materials and methods**

### 336 Rice paddy microcosms

337 Soil from planted rice paddy microcosms described in S. Wörner et al. (7) was analyzed. In brief,  
338 microcosms were sampled destructively after 58-59 days of a greenhouse incubation to obtain  
339 rhizosphere and bulk soil of microcosms treated without (control) and with gypsum (0.15% (w/w)  
340  $\text{CaSO}_4 \times 2\text{H}_2\text{O}$ ). In addition, freshly flooded soil was incubated for three days in the absence of a rice  
341 seedling and denoted as  $T_0$ . As such, the experimental setup resulted in five different soil habitats:  
342 bulk soil with and without gypsum addition, rhizosphere soil with and without gypsum addition, and  
343 freshly flooded soil. Sampling from the different soil compartments and DNA extraction based on  
344 beat beating and phenol-chloroform extraction were as described in S. Wörner et al. (7).

### 345 Metagenome sequencing, assembly, and binning

346 Rhizosphere- and bulk soil-derived DNA extracts were obtained from four separate microcosms per  
347 treatment (gypsum and control). In addition, three DNA samples were obtained from freshly flooded

348 soil. For each replicate, 2  $\mu$ g of DNA were used for metagenomic library preparation and paired-end  
349 sequencing ( $2 \times 100$  bp) on an Illumina HiSeq 2000 platform at the King Abdullah University of  
350 Science and Technology, Thuwal, Saudi Arabia. Raw reads were processed in the CLC Genomics  
351 Workbench 5.5.1 (CLC bio, Aarhus, Denmark) using only paired-end reads  $>50$  bp with  $\leq 1$  ambiguity  
352 and a quality score  $\geq 0.03$  (corresponds to 99% accuracy). *De novo* assembly of pooled reads per  
353 habitat type was done in CLC using a k-mer size of 41 (determined as optimal in preliminary tests).  
354 Contigs with  $<2000$  bp were discarded. Scaffolds containing 16S rRNA genes, 23S rRNA genes, or  
355 *dsrAB* were identified by a blastn search (57) against the respective SILVA reference databases v.123  
356 (58) or a *dsrAB* reference database (37). Coverage of scaffolds was determined in CLC using 100%  
357 identity over the full length of quality trimmed reads. This was done for each sequenced replicate  
358 separately for statistical analysis and in addition using pooled replicates per habitat type for genome  
359 binning.

360 Genome binning was performed according to M. Albertsen et al. (59) using the gypsum and control  
361 treatment as differential coverage conditions (Fig. S3). From the 159 obtained genome bins, a *dsrAB*-  
362 carrying *Nitrospirae* bin assembled from gypsum-treated bulk soil was selected for further refinement  
363 (Figure S1). First, quality-trimmed reads that mapped to the *Nitrospirae* bin as well as to  
364 taxonomically unaffiliated scaffolds of similar coverage were re-assembled in CLC and binned as  
365 outlined above. Thereafter, obtained scaffolds were co-assembled with quality-trimmed reads of the  
366 first step using SPAdes (60). Binning resulted in the genome bin Nbg-4 (*Nitrospirae* genome bin  
367 from bulk soil treated with gypsum). Using this procedure, the genome of Nbg-4 could be extended  
368 from 1.15 Mbp with 57 out of 107 queried essential single-copy genes (ESG) to 2.77 Mbp that  
369 covered 92 ESGs, with 91 of these ESGs being present as one copy. Assembly refinement of a 23S  
370 rRNA gene fragment encoded at the end of one Nbg-4 scaffold is described in Supplementary  
371 Information. Completeness, contamination and strain heterogeneity of Nbg-4 were evaluated using  
372 CheckM (61). To assess its relative abundance in the different soil habitats, quality-trimmed reads of  
373 sequenced soil replicates were mapped with a similarity threshold of 100% over the complete read to

374 the Nbg-4 scaffolds using CLC. Mapped reads were normalized to RPKM values (reads per kilobase  
375 of scaffold per million reads).

### 376 Annotation and additional analyses

377 The MicroScope platform was used for automatic annotation (62, 63). Annotation refinement was  
378 done as follows: proteins with an amino acid identity  $\geq 40\%$  (over  $\geq 80\%$  of the sequence) to a  
379 SwissProt entry (64) were annotated as homologous to proteins with a known function. Proteins with  
380 an amino acid identity  $\geq 25\%$  (over  $\geq 80\%$  of the sequence) to a SwissProt or TrEMBL (64) entry were  
381 annotated as putative homologs of the respective database entries.

382 Genome-wide average nucleotide identity (ANI, 47) and average amino acid identity (AAI, 45)  
383 comparisons were performed using the web service of the Konstantinidis laboratory at the Georgia  
384 Institute of Technology, GA, USA ([enve-omics.ce.gatech.edu](http://enve-omics.ce.gatech.edu)). The index of replication (iRep) was  
385 calculated using the iRep software (38). SAM files needed as input for iRep were created using  
386 bowtie2 (65).

387 To estimate the effect of soil habitat, gypsum treatment and the interaction thereof on the relative  
388 abundance of the *Nitrospirae* genome bin, a two-way ANOVA was performed based on RPKM  
389 values of its longest scaffold (106,945 bp) in the different replicated metagenomes. This was done  
390 using the base package of the program R, version 3.1.1 (66). Assumptions of variance homogeneity  
391 and normality were tested using Levene's test in the R package lawstat (67). Significant differences  
392 between differently treated soil habitat types were inferred using Tukey's test of honest significant  
393 difference.

### 394 Metaproteomics of rice paddy soils

395 Total proteins were extracted from the same replicated soil samples as used for metagenome  
396 sequencing. Protein extraction and subsequent in-gel tryptic digestion followed the procedure  
397 outlined in R. Starke et al. (68). Briefly, 2 g of soil was used for a phenol extraction procedure with  
398 a subsequent ammonium acetate precipitation. Tryptic peptides were analyzed using a UPLC-LTQ



399 Orbitrap Velos LC-MS/MS (69). Peptide searches were performed using the MaxQuant algorithm  
400 with the following parameters: tryptic cleavage with maximum two missed cleavages, a peptide  
401 tolerance threshold of  $\pm 10$  ppm and an MS/MS tolerance threshold of  $\pm 0.5$  Da, and carbamido  
402 methylation at cysteines as static and oxidation of methionines as variable modifications. As sample  
403 specific database, the Nbg-4 genome was used. Proteins were considered as identified with at least  
404 one unique peptide with high confidence (false discovery rate-corrected p-value  $< 0.01$ ). To check for  
405 false positive assignments, selected metaproteome replicates were also searched against the complete  
406 bacterial protein database of NCBI (08/2017).

#### 407 Phylogenetic analysis

408 Additional *Nitrospirae* genome bins carrying *dsrAB* were identified using a blast search (57) against  
409 NCBI's sequence repositories (70). Only *Nitrospirae* genome bins with a completeness above 70%  
410 and a contamination below 5% according to CheckM (61) were considered for further analysis. The  
411 phylogenetic affiliation of Nbg-4 and public *dsrAB*-carrying *Nitrospirae* genome bins was inferred  
412 using a phylogenomics approach based on 43 conserved marker genes with largely congruent  
413 phylogenetic histories as defined by D. H. Parks et al. (61) as well as using *dsrAB* and 23S rRNA  
414 genes as phylogenetic markers. Respective maximum likelihood trees were calculated using RAxML  
415 v8.2.9 (71) as implemented on the CIPRES webserver (72, [www.phylo.org](http://www.phylo.org)). Details are provided in  
416 Supplementary Information.

#### 417 Sequence information

418 All sequences are available in the Short Read Archive of NCBI under bioproject number  
419 PRJNA391190. The draft genome of Nbg-4 has been deposited in EMBL under the study accession  
420 number PRJEB21584. The mass spectrometry data have been deposited to the ProteomeXchange  
421 Consortium via the PRIDE partner repository (73) with the dataset identifier PXD007817.

## 422 **Funding information**

423 This research was financed by the German Research Foundation (DFG, PE 2147/1-1 to MP) and the  
424 European Union (FP7-People-2013-CIG, Grant No PCIG14-GA-2013-630188 to MP). Furthermore,  
425 this research was supported by the PhD School in Food Systems from the University of Milano as  
426 well as by an ERASMUS+ placement studentship, both awarded to SZ. Funding for US was provided  
427 through baseline funds from KAUST and through the USDA National Institute of Food and  
428 Agriculture, Hatch project FLA-FTL-005631. The funders had no role in study design, data collection  
429 and interpretation, or the decision to submit the work for publication. The authors declare no conflict  
430 of interests.

## 431 **Acknowledgements**

432 We are grateful to Prof. Dr. Bernhard Schink and Dr. Nicolai Müller for helpful discussions and  
433 support in naming the novel *Candidatus* genus and species.

434

## 435 **References**

- 436 1. Wind T, Stubner S, Conrad R. 1999. Sulfate-reducing bacteria in rice field soil and on rice  
437 roots. *Systematic And Applied Microbiology* 22:269–279.
- 438 2. Scheid D, Stubner S. 2001. Structure and diversity of Gram-negative sulfate-reducing bacteria  
439 on rice roots. *Fems Microbiology Ecology* 36:175–183.
- 440 3. Stubner S. 2004. Quantification of Gram-negative sulphate-reducing bacteria in rice field soil  
441 by 16S rRNA gene-targeted real-time PCR. *Journal of Microbiological Methods* 57:219–230.
- 442 4. He JZ, Liu XZ, Zheng Y, Shen JP, Zhang LM. 2010. Dynamics of sulfate reduction and  
443 sulfate-reducing prokaryotes in anaerobic paddy soil amended with rice straw. *Biology and*  
444 *Fertility of Soils* 46:283–291.
- 445 5. Lin H, Shi J, Chen X, Yang J, Chen Y, Zhao Y, Hu T. 2010. Effects of lead upon the actions  
446 of sulfate-reducing bacteria in the rice rhizosphere. *Soil Biology and Biochemistry* 42:1038-  
447 1044.
- 448 6. Liu P, Conrad R. 2017. Syntrophobacteraceae-affiliated species are major propionate-  
449 degrading sulfate reducers in paddy soil. *Environmental Microbiology* doi:10.1111/1462-  
450 2920.13698:n/a-n/a.
- 451 7. Wörner S, Zecchin S, Dan J, Todorova NH, Loy A, Conrad R, Pester M. 2016. Gypsum  
452 amendment to rice paddy soil stimulated bacteria involved in sulfur cycling but largely  
453 preserved the phylogenetic composition of the total bacterial community. *Environmental*  
454 *Microbiology Reports* 8:413–423.
- 455 8. Liu XZ, Zhang LM, Prosser JI, He JZ. 2009. Abundance and community structure of sulfate  
456 reducing prokaryotes in a paddy soil of southern China under different fertilization regimes.  
457 *Soil Biology & Biochemistry* 41:687–694.
- 458 9. Liesack W, Schnell S, Revsbech NP. 2000. Microbiology of flooded rice paddies. *Fems*  
459 *Microbiology Reviews* 24:625–645.
- 460 10. Pester M, Knorr K-H, Friedrich MW, Wagner M, Loy A. 2012. Sulfate-reducing

- 461 microorganisms in wetlands - fameless actors in carbon cycling and climate change. *Frontiers*  
462 *in Microbiology* 3:72.
- 463 11. Wind T, Conrad R. 1997. Localization of sulfate reduction in planted and unplanted rice field  
464 soil. *Biogeochemistry* 37:253–278.
- 465 12. Freney JR, Jacq VA, Baldensperger JF. 1982. The significance of the biological sulfur cycle  
466 in rice production, p 271–317. *In* Dommergues YR, Diem HG (ed), *Microbiology of tropical*  
467 *soils and plant productivity*. M. Nijhoff/W. Junk, The Hague.
- 468 13. Lefroy RDB, Mamaril CP, Blair GJ, Gonzales PJ. 1992. Sulfur cycling in rice wetlands, p  
469 279–300. *In* Howarth RW, Stewart JWB, Ivanov MV (ed), *Sulfur cycling on the continents*,  
470 vol 11. John Wiley, New York.
- 471 14. Heitmann T, Blodau C. 2006. Oxidation and incorporation of hydrogen sulfide by dissolved  
472 organic matter. *Chemical Geology* 235:12–20.
- 473 15. Yu Z-G, Peiffer S, Göttlicher J, Knorr K-H. 2015. Electron transfer budgets and kinetics of  
474 abiotic oxidation and incorporation of aqueous sulfide by dissolved organic matter.  
475 *Environmental Science & Technology* 49:5441–5449.
- 476 16. Hansel CM, Lentini CJ, Tang Y, Johnston DT, Wankel SD, Jardine PM. 2015. Dominance of  
477 sulfur-fueled iron oxide reduction in low-sulfate freshwater sediments. *ISME J* 9:2400–2412.
- 478 17. Rabus R, Hansen T, Widdel F. 2013. Dissimilatory Sulfate- and Sulfur-Reducing Prokaryotes,  
479 p 309–404. *In* Rosenberg E, DeLong E, Lory S, Stackebrandt E, Thompson F (ed), *The*  
480 *Prokaryotes* doi:10.1007/978-3-642-30141-4\_70. Springer Berlin Heidelberg.
- 481 18. Muyzer G, Stams AJM. 2008. The ecology and biotechnology of sulphate-reducing bacteria.  
482 *Nat Rev Micro* 6:441–454.
- 483 19. Henry EA, Devereux R, Maki JS, Gilmour CC, Woese CR, Mandelco L, Schauder R, Remsen  
484 CC, Mitchell R. 1994. Characterization of a new thermophilic sulfate-reducing bacterium  
485 *Thermodesulfovibrio yellowstonii*, gen. nov. and sp. nov.: its phylogenetic relationship to  
486 *Thermodesulfo bacterium commune* and their origins deep within the bacterial domain.

- 487 Archives of Microbiology 161:62-69.
- 488 20. Sonne-Hansen J, Ahring BK. 1999. *Thermodesulfobacterium hveragerdense* sp.nov., and  
489 *Thermodesulfovibrio islandicus* sp.nov., two thermophilic sulfate reducing bacteria isolated  
490 from a Icelandic hot spring. Systematic and Applied Microbiology 22:559-564.
- 491 21. Sekiguchi Y, Muramatsu M, Imachi H, Narihiro T, Ohashi A, Harada H. 2008.  
492 *Thermodesulfovibrio aggregans* sp. nov. and *Thermodesulfovibrio thiophilus* sp. nov.,  
493 anaerobic, thermophilic, sulfate-reducing bacteria isolated from thermophilic and  
494 methanogenic sludge, and emended description of the genus *Thermodesulfovibrio*. Int J Syst  
495 Evol Microbiol 58.
- 496 22. Haouari O, Fardeau M-L, Cayol J-L, Fauque G, Casiot C, Elbaz-Poulichet F, Hamdi M,  
497 Ollivier B. 2008. *Thermodesulfovibrio hydrogeniphilus* sp. nov., a new thermophilic sulphate-  
498 reducing bacterium isolated from a Tunisian hot spring. Systematic and Applied Microbiology  
499 31:38-42.
- 500 23. Frank YA, Kadnikov VV, Lukina AP, Banks D, Beletsky AV, Mardanov AV, Sen'kina EI,  
501 Avakyan MR, Karnachuk OV, Ravin NV. 2016. Characterization and genome analysis of the  
502 first facultatively alkaliphilic *Thermodesulfovibrio* isolated from the deep terrestrial  
503 subsurface. Frontiers in Microbiology 7.
- 504 24. Daims H. 2014. The family *Nitrospiraceae*, p 733-749. In Rosenberg E, DeLong EF, Lory S,  
505 Stackebrandt E, Thompson F (ed), The Prokaryotes: Other Major Lineages of Bacteria and  
506 The Archaea doi:10.1007/978-3-642-38954-2\_126. Springer Berlin Heidelberg, Berlin,  
507 Heidelberg.
- 508 25. Daims H, Lücker S, Wagner M. 2016. A new perspective on microbes formerly known as  
509 nitrite-oxidizing bacteria. Trends in Microbiology 24:699–712.
- 510 26. Spring S, Amann R, Ludwig W, Schleifer K-H, van Gemerden H, Petersen N. 1993.  
511 Dominating role of an unusual magnetotactic bacterium in the microaerobic zone of a  
512 freshwater sediment. Applied and Environmental Microbiology 59:2397-2403.

- 513 27. Jogler C, Niebler M, Lin W, Kube M, Wanner G, Kolinko S, Stief P, Beck AJ, de Beer D,  
514 Petersen N, Pan Y, Amann R, Reinhardt R, Schüler D. 2010. Cultivation-independent  
515 characterization of 'Candidatus Magnetobacterium bavaricum' via ultrastructural,  
516 geochemical, ecological and metagenomic methods. *Environmental Microbiology* 12:2466-  
517 2478.
- 518 28. Lin W, Deng A, Wang Z, Li Y, Wen T, Wu L-F, Wu M, Pan Y. 2014. Genomic insights into  
519 the uncultured genus 'Candidatus Magnetobacterium' in the phylum Nitrospirae. *ISME J*  
520 8:2463-2477.
- 521 29. Lefèvre CT, Abreu F, Schmidt ML, Lins U, Frankel RB, Hedlund BP, Bazylinski DA. 2010.  
522 Moderately thermophilic magnetotactic bacteria from hot springs in Nevada. *Applied and*  
523 *Environmental Microbiology* 76:3740-3743.
- 524 30. Lefèvre CT, Frankel RB, Abreu F, Lins U, Bazylinski DA. 2011. Culture-independent  
525 characterization of a novel, uncultivated magnetotactic member of the Nitrospirae phylum.  
526 *Environmental Microbiology* 13:538-549.
- 527 31. Kolinko S, Richter M, Glöckner F-O, Brachmann A, Schüler D. 2016. Single-cell genomics  
528 of uncultivated deep-branching magnetotactic bacteria reveals a conserved set of  
529 magnetosome genes. *Environmental Microbiology* 18:21-37.
- 530 32. Lin W, Paterson GA, Zhu Q, Wang Y, Kopylova E, Li Y, Knight R, Bazylinski DA, Zhu R,  
531 Kirschvink JL, Pan Y. 2017. Origin of microbial biomineralization and magnetotaxis during  
532 the Archean. *Proceedings of the National Academy of Sciences* 114:2171-2176.
- 533 33. Lefèvre CT, Bazylinski DA. 2013. Ecology, diversity, and evolution of magnetotactic  
534 bacteria. *Microbiology and Molecular Biology Reviews* 77:497-526.
- 535 34. Santos AA, Venceslau SS, Grein F, Leavitt WD, Dahl C, Johnston DT, Pereira IAC. 2015. A  
536 protein trisulfide couples dissimilatory sulfate reduction to energy conservation. *Science*  
537 350:1541-1545.
- 538 35. Pereira IsAC, Ramos AR, Grein F, Marques MC, Da Silva SM, Venceslau SS. 2011. A

- 539 comparative genomic analysis of energy metabolism in sulfate reducing bacteria and archaea.  
540 Frontiers in Microbiology 2.
- 541 36. Milucka J, Ferdelman TG, Polerecky L, Franzke D, Wegener G, Schmid M, Lieberwirth I,  
542 Wagner M, Widdel F, Kuypers MMM. 2012. Zero-valent sulphur is a key intermediate in  
543 marine methane oxidation. Nature 491:541–546.
- 544 37. Müller AL, Kjeldsen KU, Rattei T, Pester M, Loy A. 2015. Phylogenetic and environmental  
545 diversity of DsrAB-type dissimilatory (bi)sulfite reductases. ISME J 9:1152–1165.
- 546 38. Brown CT, Olm MR, Thomas BC, Banfield JF. 2016. Measurement of bacterial replication  
547 rates in microbial communities. Nat Biotech 34:1256-1263.
- 548 39. Rabus R, Venceslau SS, Wöhlbrand L, Voordouw G, Wall JD, Pereira IAC. 2015. A Post-  
549 Genomic View of the Ecophysiology, Catabolism and Biotechnological Relevance of  
550 Sulphate-Reducing Prokaryotes, p 55-321. In Robert KP (ed), Advances in Microbial  
551 Physiology, vol Volume 66. Academic Press.
- 552 40. Thorup C, Schramm A, Findlay AJ, Finster KW, Schreiber L. 2017. Disguised as a sulfate  
553 reducer: Growth of the Deltaproteobacterium *Desulfurivibrio alkaliphilus* by sulfide  
554 oxidation with nitrate. mBio 8.
- 555 41. Holkenbrink C, Barbas SO, Møllerup A, Otaki H, Frigaard N-U. 2011. Sulfur globule  
556 oxidation in green sulfur bacteria is dependent on the dissimilatory sulfite reductase system.  
557 Microbiology 157:1229-1239.
- 558 42. Anantharaman K, Brown CT, Hug LA, Sharon I, Castelle CJ, Probst AJ, Thomas BC, Singh  
559 A, Wilkins MJ, Karaoz U, Brodie EL, Williams KH, Hubbard SS, Banfield JF. 2016.  
560 Thousands of microbial genomes shed light on interconnected biogeochemical processes in  
561 an aquifer system. Nature Communications 7:13219.
- 562 43. Probst AJ, Castelle CJ, Singh A, Brown CT, Anantharaman K, Sharon I, Hug LA, Burstein  
563 D, Emerson JB, Thomas BC, Banfield JF. 2016. Genomic resolution of a cold subsurface  
564 aquifer community provides metabolic insights for novel microbes adapted to high CO<sub>2</sub>

- 565 concentrations. *Environmental Microbiology* 19:459–474.
- 566 44. Simon J, Sanger M, Schuster SC, Gross R. 2003. Electron transport to periplasmic nitrate  
567 reductase (NapA) of *Wolinella succinogenes* is independent of a NapC protein. *Molecular*  
568 *Microbiology* 49:69-79.
- 569 45. Rodriguez-R L, Konstantinidis K. 2014. Bypassing cultivation to identify bacterial species.  
570 *Microbe Magazine* 9:111-118.
- 571 46. Varghese NJ, Mukherjee S, Ivanova N, Konstantinidis KT, Mavrommatis K, Kyrpides NC,  
572 Pati A. 2015. Microbial species delineation using whole genome sequences. *Nucleic Acids*  
573 *Research* doi:10.1093/nar/gkv657.
- 574 47. Goris J, Konstantinidis KT, Klappenbach JA, Coenye T, Vandamme P, Tiedje JM. 2007.  
575 DNA–DNA hybridization values and their relationship to whole-genome sequence  
576 similarities. *International Journal of Systematic and Evolutionary Microbiology* 57:81-91.
- 577 48. Baker BJ, Lazar CS, Teske AP, Dick GJ. 2015. Genomic resolution of linkages in carbon,  
578 nitrogen, and sulfur cycling among widespread estuary sediment bacteria. *Microbiome* 3:14.
- 579 49. Konno U, Kouduka M, Komatsu DD, Ishii K, Fukuda A, Tsunogai U, Ito K, Suzuki Y. 2013.  
580 Novel microbial populations in deep granitic groundwater from Grimsel test site, Switzerland.  
581 *Microbial Ecology* 65:626-637.
- 582 50. Schwarz JIK, Lueders T, Eckert W, Conrad R. 2007. Identification of acetate-utilizing  
583 Bacteria and Archaea in methanogenic profundal sediments of Lake Kinneret (Israel) by  
584 stable isotope probing of rRNA. *Environmental Microbiology* 9:223-237.
- 585 51. Narro AB, Angle JC, Daly RA, Stefanik KC, Wrighton KC, Miller CS. 2017. High-  
586 resolution sequencing reveals unexplored archaeal diversity in freshwater wetland soils.  
587 *Environmental Microbiology* doi:10.1111/1462-2920.13703:n/a-n/a.
- 588 52. Chen J, Liu X, Li L, Zheng J, Qu J, Zheng J, Zhang X, Pan G. 2015. Consistent increase in  
589 abundance and diversity but variable change in community composition of bacteria in topsoil  
590 of rice paddy under short term biochar treatment across three sites from South China. *Applied*



- 591 Soil Ecology 91:68-79.
- 592 53. Gao S-j, Zhang R-g, Cao W-d, Fan Y-y, Gao J-s, Huang J, Bai J-s, Zeng N-h, Chang D-n,  
593 Katsu-yoshi S, Thorup-Kristensen K. 2015. Long-term rice-rice-green manure rotation  
594 changing the microbial communities in typical red paddy soil in South China. Journal of  
595 Integrative Agriculture 14:2512-2520.
- 596 54. Marietou A, Griffiths L, Cole J. 2009. Preferential Reduction of the Thermodynamically Less  
597 Favorable Electron Acceptor, Sulfate, by a Nitrate-Reducing Strain of the Sulfate-Reducing  
598 Bacterium *Desulfovibrio desulfuricans* 27774. Journal of Bacteriology 191:882-889.
- 599 55. Dannenberg S, Kroder M, Dilling W, Cypionka H. 1992. Oxidation of H<sub>2</sub>, organic compounds  
600 and inorganic sulfur compounds coupled to reduction of O<sub>2</sub> or nitrate by sulfate-reducing  
601 bacteria. Archives of Microbiology 158:93-99.
- 602 56. Holmes DE, Bond DR, Lovley DR. 2004. Electron transfer by *Desulfobulbus propionicus* to  
603 Fe(III) and graphite Electrodes. Applied and Environmental Microbiology 70:1234-1237.
- 604 57. Altschul SF, Gish W, Miller W, Myers EW, Lipman DJ. 1990. Basic local alignment search  
605 tool. Journal of Molecular Biology 215:403-410.
- 606 58. Quast C, Pruesse E, Yilmaz P, Gerken J, Schweer T, Yarza P, Peplies J, Glöckner FO. 2013.  
607 The SILVA ribosomal RNA gene database project: improved data processing and web-based  
608 tools. Nucleic Acids Research 41:D590-D596.
- 609 59. Albertsen M, Hugenholtz P, Skarshewski A, Nielsen KL, Tyson GW, Nielsen PH. 2013.  
610 Genome sequences of rare, uncultured bacteria obtained by differential coverage binning of  
611 multiple metagenomes. Nat Biotech 31:533-538.
- 612 60. Bankevich A, Nurk S, Antipov D, Gurevich AA, Dvorkin M, Kulikov AS, Lesin VM,  
613 Nikolenko SI, Pham S, Prjibelski AD, Pyshkin AV, Sirotkin AV, Vyahhi N, Tesler G,  
614 Alekseyev MA, Pevzner PA. 2012. SPAdes: a new genome assembly algorithm and its  
615 applications to single-cell sequencing. Journal of Computational Biology 19:455-477.
- 616 61. Parks DH, Imelfort M, Skennerton CT, Hugenholtz P, Tyson GW. 2015. CheckM: assessing

- 617 the quality of microbial genomes recovered from isolates, single cells, and metagenomes.  
618 Genome Research 25:1043-1055.
- 619 62. Vallenet D, Calteau A, Cruveiller S, Gachet M, Lajus A, Josso A, Mercier J, Renaux A, Rollin  
620 J, Rouy Z, Roche D, Scarpelli C, Médigue C. 2017. MicroScope in 2017: an expanding and  
621 evolving integrated resource for community expertise of microbial genomes. Nucleic Acids  
622 Research 45:D517-D528.
- 623 63. Vallenet D, Labarre L, Rouy Z, Barbe V, Bocs S, Cruveiller S, Lajus A, Pascal G, Scarpelli  
624 C, Médigue C. 2006. MaGe: a microbial genome annotation system supported by synteny  
625 results. Nucleic Acids Research 34:53-65.
- 626 64. The-Uniprot-Consortium. 2017. UniProt: the universal protein knowledgebase. Nucleic Acids  
627 Research 45:D158-D169.
- 628 65. Langmead B, Salzberg SL. 2012. Fast gapped-read alignment with Bowtie 2. Nat Meth 9:357-  
629 359.
- 630 66. R-Core-Team. 2015. R: A language and environment for statistical computing. (R  
631 Foundation for Statistical Computing). on Vienna, Austria. <http://www.R-project.org>.  
632 Accessed
- 633 67. Hui W, Gel YR, Gastwirth JL. 2008. lawstat: An R package for law, public policy and  
634 biostatistics. Journal of Statistical Software 28:1-26.
- 635 68. Starke R, Kermer R, Ullmann-Zeunert L, Baldwin IT, Seifert J, Bastida F, von Bergen M,  
636 Jehmlich N. 2016. Bacteria dominate the short-term assimilation of plant-derived N in soil.  
637 Soil Biology and Biochemistry 96:30-38.
- 638 69. Herbst F-A, Taubert M, Jehmlich N, Behr T, Schmidt F, von Bergen M, Seifert J. 2013.  
639 Sulfur-<sup>34</sup>S stable isotope labeling of amino acids for quantification (SULAQ34) of proteomic  
640 changes in *Pseudomonas fluorescens* during naphthalene degradation. Molecular & Cellular  
641 Proteomics 12:2060-2069.
- 642 70. NCBI-Resource-Coordinators. 2017. Database resources of the National Center for

- 643 Biotechnology Information. *Nucleic Acids Research* 45:D12-D17.
- 644 71. Stamatakis A. 2014. RAxML Version 8: A tool for phylogenetic analysis and post-analysis of  
645 large phylogenies. *Bioinformatics* 30:1312–1313.
- 646 72. Miller MA, Pfeiffer W, Schwartz T. 2010. Creating the CIPRES Science Gateway for  
647 inference of large phylogenetic trees, abstr Gateway Computing Environments Workshop  
648 (GCE), New Orleans, LA, USA, 14 Nov. 2010
- 649 73. Vizcaíno JA, Csordas A, del-Toro N, Dianes JA, Griss J, Lavidas I, Mayer G, Perez-Riverol  
650 Y, Reisinger F, Ternent T, Xu Q-W, Wang R, Hermjakob H. 2016. 2016 update of the PRIDE  
651 database and its related tools. *Nucleic Acids Research* 44:D447-D456.
- 652 74. Ludwig W, Strunk O, Westram R, Richter L, Meier H, Yadhukumar, Buchner A, Lai T, Steppi  
653 S, Jobb G, Forster W, Brettske I, Gerber S, Ginhart AW, Gross O, Grumann S, Hermann S,  
654 Jost R, König A, Liss T, Lussmann R, May M, Nonhoff B, Reichel B, Strehlow R, Stamatakis  
655 A, Stuckmann N, Vilbig A, Lenke M, Ludwig T, Bode A, Schleifer K-H. 2004. ARB: a  
656 software environment for sequence data. *Nucl Acids Res* 32:1363–1371.
- 657
- 658

659 **Figures**

660

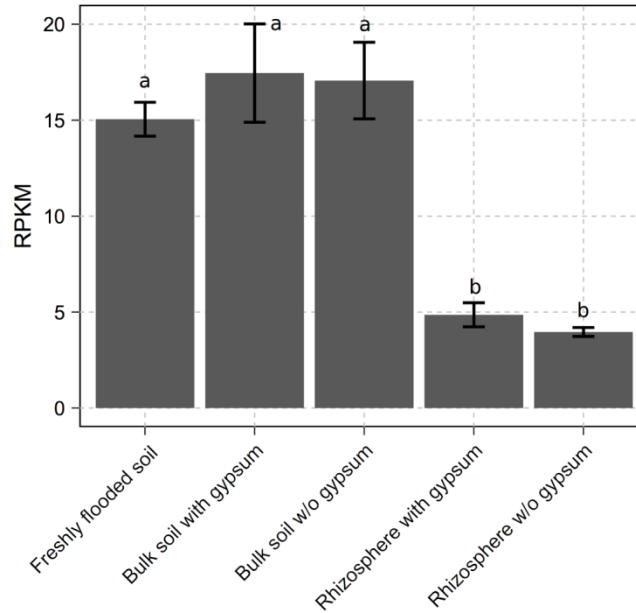

661

662 **Figure 1.** Average relative abundance ( $\pm$  one standard deviation) of *Nitrospirae* bacterium Nbg-4 in  
663 the differently treated soil habitats as inferred from the RPKM values (reads per kilobase of scaffold  
664 per million reads) of its longest scaffold. Significant differences are indicated by different letters and  
665 were inferred by a two-way ANOVA and a post-hoc Tukey test ( $p < 0.001$ ).

666

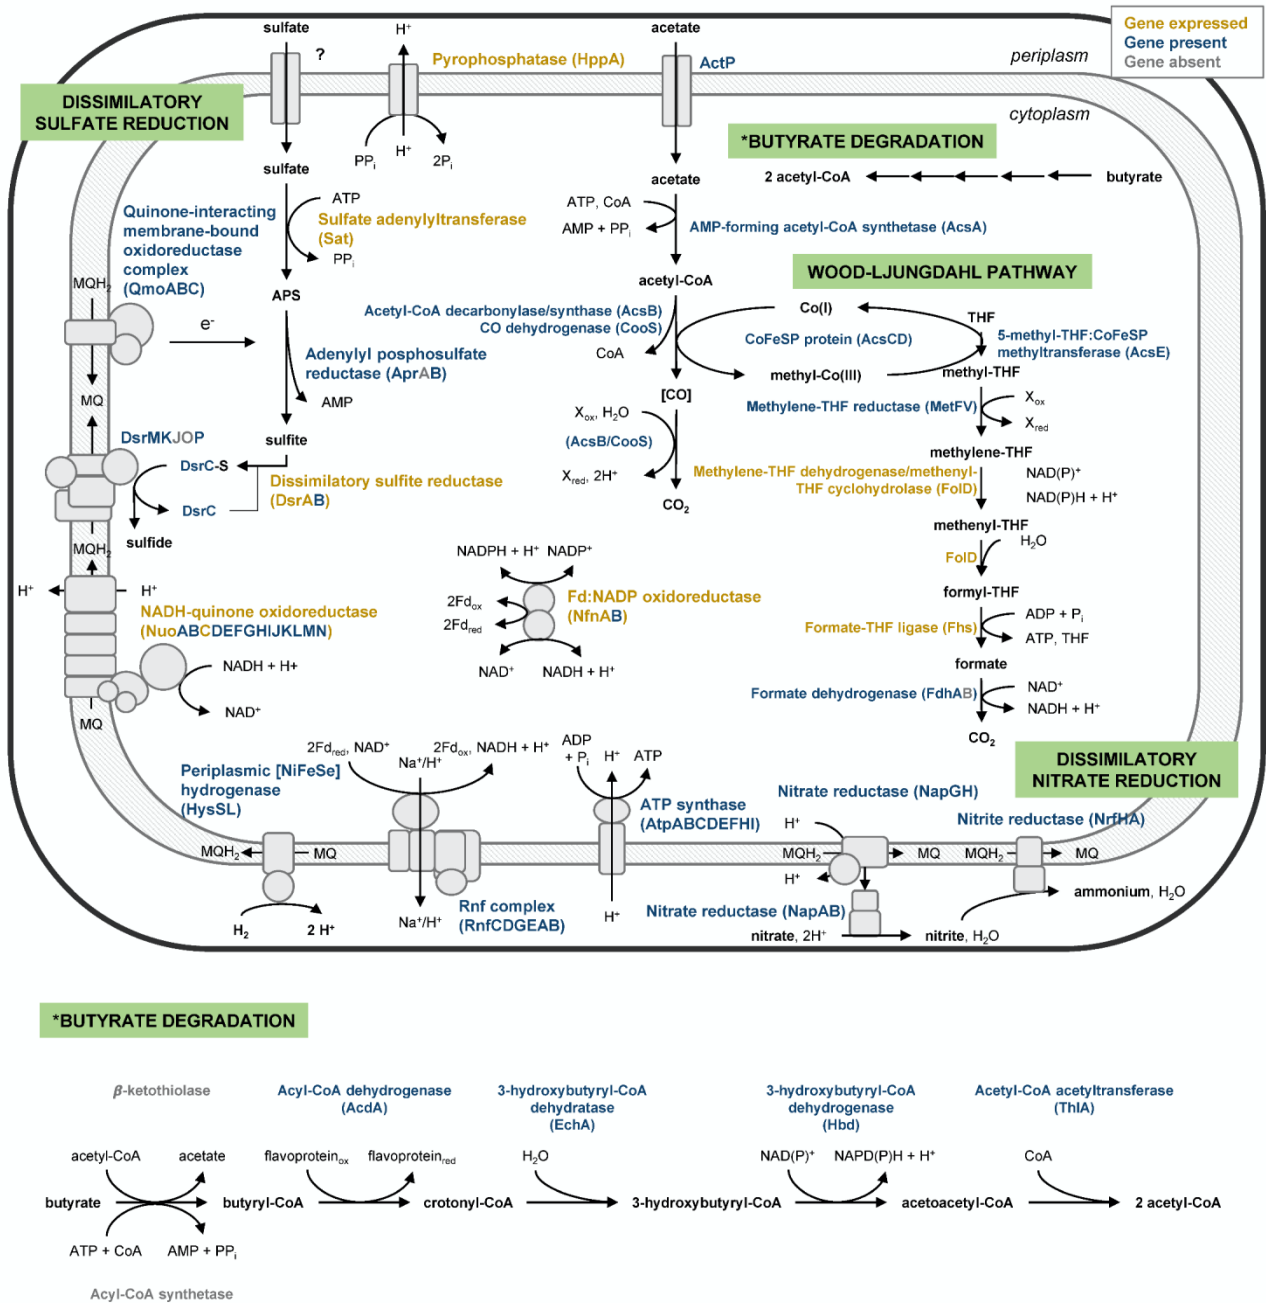

667

668 **Figure 2.** Schematic view of reconstructed energy metabolism pathways in *Nitrospira* bacterium

669 *Nbg-4*. *In situ* expression of proteins in bulk soil treated with gypsum as revealed by metaproteomics

670 is color-indicated. Protein expression in other soil habitats and treatments is given in Table S2.

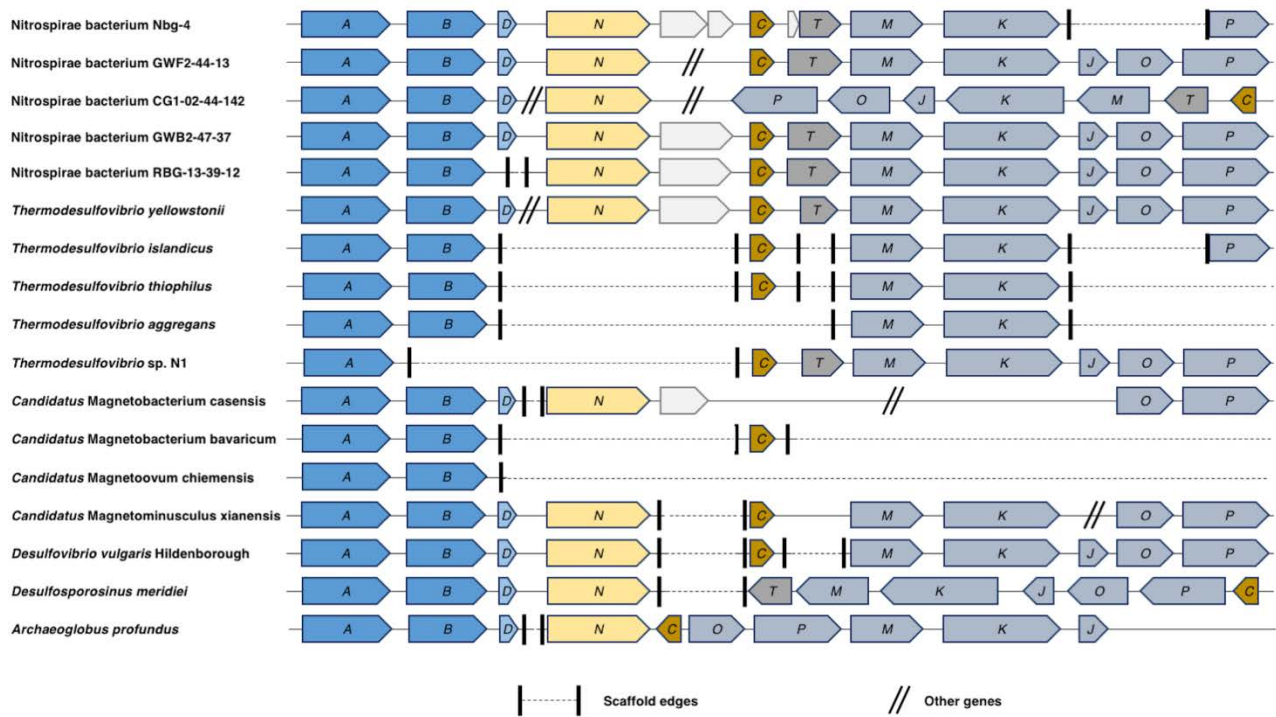

671

672 **Figure 3.** Organization and synteny of the *dsr* operon in *Nitrospirae* bacterium Nbg-4 in comparison  
 673 to other *dsrAB*-carrying members of the phylum *Nitrospirae*. In addition, typical representatives of  
 674 known sulfate-reducing microorganisms within the Deltaproteobacteria (*Desulfovibrio vulgaris*  
 675 Hildenborough), Firmicutes (*Desulfosporosinus meridiei*), and Archaea (*Archaeoglobus fulgidus*) are  
 676 shown.

677

**A. Concatenated essential proteins**

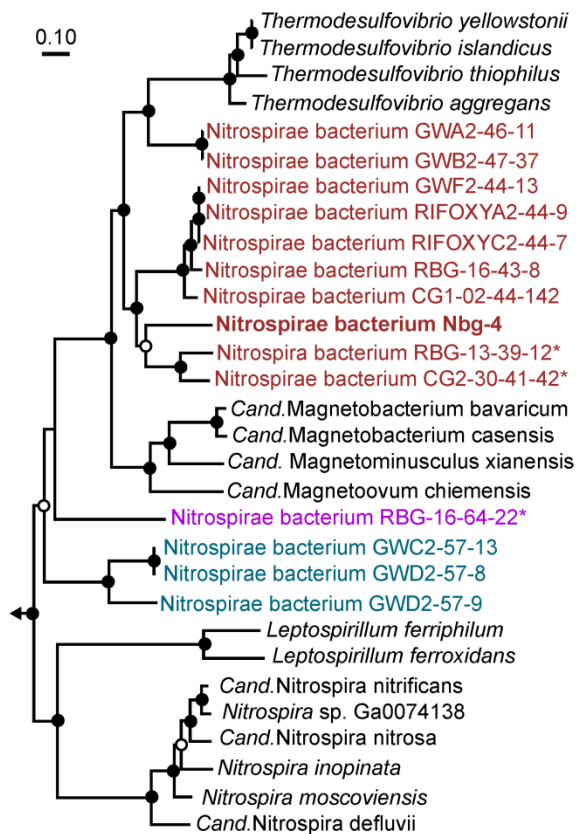

**B. DsrAB**

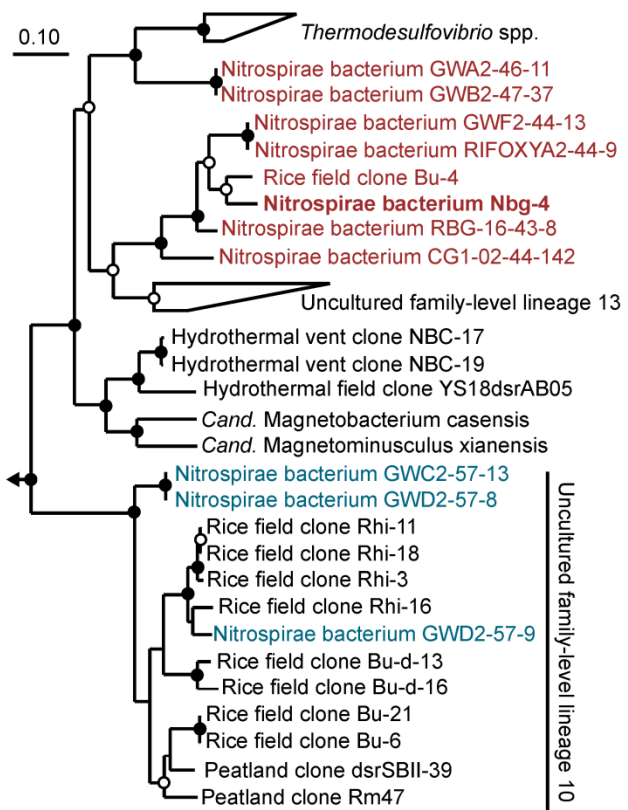

**C. 23S rRNA gene**

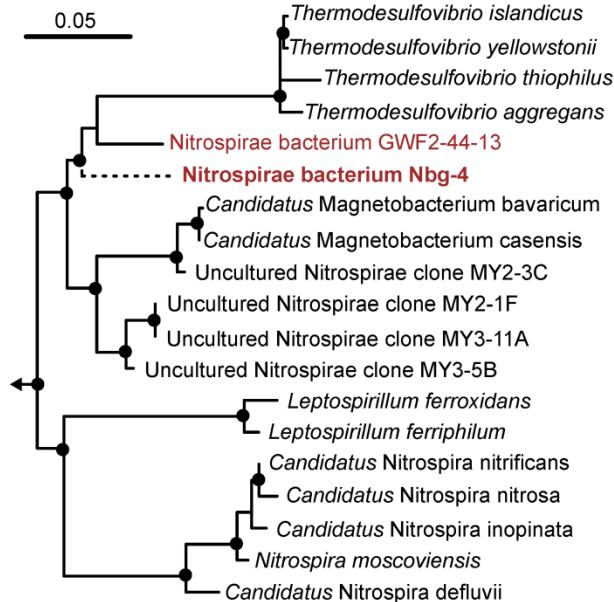

678

679 **Figure 4.** Phylogeny of *Nitrospirae* bacterium Nbg-4 (in bold) and related *dsrAB*-carrying  
 680 *Nitrospirae* bacteria recovered from metagenomes of groundwater systems (42, 43). Uncultured  
 681 *dsrAB*-carrying *Nitrospirae* bacteria that form separate genera as inferred by the genome-wide AAI

682 approach are color coded. Maximum likelihood trees were inferred using the RAxML algorithm (71)  
683 and (A) a concatenated alignment of 43 essential proteins (Table S6), (B) deduced DsrAB sequences,  
684 and (C) the 23S rRNA gene. The partially recovered 23S rRNA gene of Nbg-4 was added to a  
685 RAxML tree of almost full-length 23S rRNA genes using the Quick add parsimony tool as  
686 implemented in ARB (74) without changing the tree topology. This is indicated by the dashed branch  
687 leading to Nbg-4 in this tree. Bootstrap support is indicated by closed ( $\geq 90\%$ ) and open ( $\geq 70\%$ ) circles  
688 at the respective branching points. The scale bar indicates 10 or 5% estimated sequence divergence,  
689 respectively.

## 690 Tables

691 **Table 1.** Characteristics of the obtained draft genome of *Nitrospirae* bacterium Nbg-4.

| <i>Nitrospirae</i> bacterium Nbg-4 |      |
|------------------------------------|------|
| <b>Genome feature</b>              |      |
| Chromosome size (Mbp)              | 2.77 |
| GC content (%)                     | 49   |
| Number of scaffolds                | 151  |
| Number of CDS                      | 2855 |
| Average CDS length (bp)            | 855  |
| Protein coding density (%)         | 87   |
| Number of rRNA genes               | 1    |
| Number of tRNA genes               | 21   |
| <b>ChekM analysis</b>              |      |
| Completeness (%)                   | 75.5 |
| Contamination (%)                  | 2.0  |
| Strain heterogeneity (%)           | 0.0  |
| <b>iRep analysis</b>               |      |
| iRep initial soil                  | 1.73 |
| iRep bulk soil without gypsum      | 1.34 |
| iRep bulk soil with gypsum         | 1.31 |

692



693 **Table 2.** Locus tag of genes involved in dissimilatory sulfate reduction in *Nitrospirae* bacterium Nbg-  
 694 4, related *dsrAB*-carrying *Nitrospirae* recovered from groundwater metagenomes (42, 43), and  
 695 *Thermodesulfobivrio yellowstonii*.

| Genome                                             | <i>dsrA</i> | <i>dsrB</i> | <i>dsrD</i> | <i>dsrN</i> | <i>dsrC</i> | <i>dsrT</i> | <i>dsrM</i> | <i>dsrK</i> | <i>dsrJ</i> | <i>dsrO</i> | <i>dsrP</i> |
|----------------------------------------------------|-------------|-------------|-------------|-------------|-------------|-------------|-------------|-------------|-------------|-------------|-------------|
| <i>Nitrospirae</i> bacterium Nbg-4 (Nbg4)          | 480011      | 480010      | 480009      | 480008      | 480005      | 480003      | 480002      | 480001      | -           | -           | 1080008     |
| <i>Nitrospirae</i> bacterium GWF2-44-13 (A2X54)    | 05135       | 05130       | 05125       | 05120       | 00165       | 00170       | 00175       | 00180       | 00185       | 00190       | 00195       |
| <i>Nitrospirae</i> bacterium CG1-02-44-142 (AUJ60) | 04265       | 04260       | 04255       | 09835       | 04175       | 04180       | 04185       | 04190       | 04195       | 04200       | 0425        |
| <i>Nitrospirae</i> bacterium GWB2-47-37 (A2X55)    | 01500       | 01495       | 01490       | 01485       | 01475       | 01470       | 01465       | 01460       | 01455       | 01450       | 01445       |
| <i>Nitrospirae</i> bacterium RBG-13-39-12 (A2Y97)  | 05490       | 05485       | -           | 05450       | 05445       | 05440       | 05435       | 05430       | 05425       | 05420       | 05415       |
| <i>Thermodesulfobivrio yellowstonii</i> (THEYE)    | A.1994      | A.1995      | A.1996      | A.0001      | A.0003      | A.0004      | A.0005      | A.0006      | A.0007      | A.0008      | A.0009      |
|                                                    | <i>apra</i> | <i>aprB</i> | <i>sat</i>  | <i>hppA</i> | <i>qmoA</i> | <i>qmoB</i> | <i>qmoC</i> |             |             |             |             |
| <i>Nitrospirae</i> bacterium Nbg-4                 | -           | 690001      | 690002      | 30083       | 30087       | 30086       | 30085       |             |             |             |             |
| <i>Nitrospirae</i> bacterium GWF2-44-13 (A2X54)    | 02100       | 02105       | 02110       | 02080       | 02095       | 02090       | 02085       |             |             |             |             |
| <i>Nitrospirae</i> bacterium CG1-02-44-142 (AUJ60) | -           | -           | 03990       | 08585       | 08565       | 08570       | 08575       |             |             |             |             |
| <i>Nitrospirae</i> bacterium GWB2-47-37 (A2X55)    | 02795       | 02800       | 02805       | 02770       | 02790       | 02785       | 02780       |             |             |             |             |
| <i>Nitrospirae</i> bacterium RBG-13-39-12 (A2Y97)  | 02630       | 02635       | 02645       | 02470       | 02455       | 02460       | 02465       |             |             |             |             |
| <i>Thermodesulfobivrio yellowstonii</i> (THEYE)    | A1832       | A1833       | A1835       | -           | A1831       | A1830       | A1829       |             |             |             |             |

## 696 **Supplementary figure legends**

697 **Figure S1.** Phylogeny of deduced DsrAB sequences of *Nitrospirae* bacterium Nbg-4 and related  
698 *dsrAB*-carrying *Nitrospirae* bacteria recovered from metagenomes of groundwater systems (42, 43).  
699 A maximum likelihood tree were inferred using the RAxML algorithm (71). Bootstrap support is  
700 indicated by closed ( $\geq 90\%$ ) and open ( $\geq 70\%$ ) circles at the respective branching points. *Nitrospirae*  
701 bacteria with *dsrAB* that underwent horizontal gene transfer are marked with an asterisk. The scale  
702 bar indicates 10% estimated sequence divergence.

703 **Figure S2.** Maximum likelihood 16S rRNA gene tree showing the phylogenetic position of species-  
704 level OTUs affiliated to the phylum *Nitrospirae*, which were obtained in a previous study (7) using  
705 the same rice paddy soil samples as analyzed in the current study. The tree was reconstructed using  
706 the RAxML algorithm (71) as implemented in ARB (74) using 1,222 unambiguously aligned  
707 nucleotide positions and a 50% conservation filter for the domain Bacteria. The representative 454  
708 amplicon sequences were added to the tree by using ARB's Parsimony Interactive tool as indicated  
709 by the dashed branch. Solid circles indicate  $\geq 90\%$  and open circles  $\geq 70\%$  bootstrap support (1000  
710 replications). The bar represents 10% inferred sequence divergence.

711 **Figure S3.** Schematic overview of the bioinformatics workflow to obtain the high quality draft  
712 genome of *Nitrospirae* bacterium Nbg-4.

713

## 714 **Supplementary table legends**

715 **Table S1.** Key characteristics of sequenced metagenomes.

716 **Table S2.** Annotation and locus of genes involved in energy and biosynthesis metabolism in  
717 *Nitrospirae* bacterium Nbg-4. Expression of respective genes as proteins is indicated in the  
718 metaproteomes of the respective analyzed soil replicates.

719 **Table S3.** Main characteristics of members of the phylum *Nitrospirae*.

720 **Table S4.** Genome-wide average nucleotide identity (gANI) of *Nitrospirae* bacterium Ngb-4 in  
721 comparison to other members of the phylum *Nitrospirae*.

722 **Table S5.** Genome-wide average amino acid identity (gAAI) of *Nitrospirae* bacterium Nbg-4 in  
723 comparison to other members of the phylum *Nitrospirae*.
